# Supplementary material for: The longitudinal validity of proxy-reported CHU9D
Source: Springer Nature journal article supplement (doi:10.1007/s11136-021-02774-9), 2021-02-13
Supplement: MOESM1 [file 18860214]

# Wolf, RT., Ratcliffe, J., Chen, G., Jeppesen, P. The longitudinal validity of proxy-reported CHU9D.

## Appendix

Table A: Spearman rank correlation coefficients for CHU9D items, SDQ Total difficulties score, SDQ Impact score and KIDSCREEN-27

|                                      | Worried   | Sad       | Pain      | Tired     | Annoyed   | Schoolwork / homework | Sleep     | Daily Routine | Activities |
|--------------------------------------|-----------|-----------|-----------|-----------|-----------|-----------------------|-----------|---------------|------------|
| SDQ Total difficulties score         | 0.053     | 0.256***  | 0.083     | 0.036     | 0.195***  | 0.243***              | 0.018     | 0.251***      | 0.230***   |
| SDQ Impact Score                     | 0.183***  | 0.308***  | 0.074     | 0.113*    | 0.160**   | 0.248***              | 0.020     | 0.282***      | 0.346***   |
| KIDSCREEN Physical Well-being        | -0.266*** | -0.329*** | -0.251*** | -0.283*** | -0.103*   | -0.172***             | -0.157**  | -0.257***     | -0.436***  |
| KIDSCREEN Psychological Well-being   | -0.439*** | -0.541*** | -0.186*** | -0.309*** | -0.222*** | -0.265***             | -0.220*** | -0.334***     | -0.430***  |
| KIDSCREEN Autonomy & Parent Relation | -0.004    | -0.103*   | -0.052    | 0.049     | -0.177*** | -0.153**              | -0.079    | -0.227***     | -0.079     |
| KIDSCREEN Social Support & Peers     | -0.150**  | -0.173*** | -0.079    | -0.056    | -0.028    | -0.121*               | -0.046    | -0.117*       | -0.316***  |
| KIDSCREEN School Environment         | -0.114*   | -0.168*** | 0.039     | -0.012    | -0.118*   | -0.458***             | -0.080    | -0.199***     | -0.297***  |

Note: \* P<0.05 \*\*P<0.01 \*\*\*P<0.001

# Wolf, RT., Ratcliffe, J., Chen, G., Jeppesen, P. The longitudinal validity of proxy-reported CHU9D.

Table B: Spearman rank correlation coefficients for CHU9D items, SDQ scales and SDQ items.

|                             | Worried         | Sad             | Pain     | Tired    | Annoyed         | Schoolwork /homework | Sleep    | Daily Routine | Activities | CHU9D adult weights | CHU9D adolescent weights |
|-----------------------------|-----------------|-----------------|----------|----------|-----------------|----------------------|----------|---------------|------------|---------------------|--------------------------|
| <b>Total difficulties</b>   | 0.053           | 0.256***        | 0.083    | 0.036    | 0.195***        | 0.243***             | 0.018    | 0.251***      | 0.230***   | -0.285***           | -0.294***                |
| <b>Emotion scale</b>        | 0.435***        | 0.342***        | 0.248*** | 0.134**  | 0.008           | 0.051                | 0.237*** | 0.143**       | 0.271***   | -0.348***           | -0.365***                |
| <b>Conduct scale</b>        | -0.265***       | 0.044           | -0.046   | -0.036   | 0.321***        | 0.074                | -0.074   | 0.236***      | 0.036      | -0.105*             | -0.082                   |
| <b>Hyper scale</b>          | -0.099*         | 0.074           | -0.022   | -0.026   | 0.170***        | 0.265***             | -0.041   | 0.209***      | 0.096*     | -0.131**            | -0.149**                 |
| <b>Peer scale</b>           | 0.049           | 0.115*          | -0.003   | 0.001    | -0.037          | 0.152**              | -0.070   | -0.006        | 0.125*     | -0.068              | -0.070                   |
| <b>Prosocial scale #</b>    | 0.160**         | -0.005          | 0.108*   | 0.091    | -0.219***       | -0.105*              | 0.109*   | -0.132**      | -0.057     | 0.036               | 0.032                    |
| Considerate #               | 0.222***        | -0.038          | 0.078    | 0.064    | -0.246***       | -0.061               | 0.064    | -0.084        | -0.023     | 0.041               | 0.016                    |
| Restless                    | -0.051          | 0.017           | -0.021   | -0.017   | 0.079           | 0.108*               | 0.019    | 0.166***      | 0.001      | -0.045              | -0.078                   |
| Sickness                    | 0.286***        | 0.248***        | 0.282*** | 0.135**  | 0.046           | 0.062                | 0.214*** | 0.192***      | 0.226***   | -0.311***           | -0.311***                |
| Shares #                    | 0.041           | -0.056          | 0.104*   | 0.025    | -0.156**        | -0.061               | 0.081    | -0.068        | -0.008     | 0.010               | 0.0381                   |
| Loses temper                | -0.169***       | 0.074           | -0.010   | 0.017    | <b>0.394***</b> | 0.039                | -0.037   | 0.212***      | 0.067      | -0.147**            | -0.134**                 |
| Pref solitary               | 0.125*          | 0.089           | -0.006   | 0.031    | -0.076          | 0.155**              | -0.032   | 0.006         | 0.194***   | -0.071              | -0.69                    |
| Well behaved #              | 0.250***        | -0.041          | 0.029    | 0.035    | -0.221***       | -0.086               | 0.024    | -0.242***     | -0.008     | 0.101*              | 0.061                    |
| Many worries                | <b>0.399***</b> | 0.220***        | 0.175*** | 0.109*   | -0.079          | -0.002               | 0.229*** | 0.015         | 0.169***   | -0.217***           | -0.236***                |
| Help others if hurt #       | 0.064           | 0.037           | 0.100*   | 0.106*   | -0.087          | -0.059               | 0.059    | -0.131**      | -0.050     | 0.009               | 0.016                    |
| Fidgeting                   | -0.075          | 0.038           | 0.012    | 0.001    | 0.092           | 0.117*               | -0.036   | 0.136**       | 0.036      | -0.063              | -0.083                   |
| One good friend #           | 0.022           | -0.079          | 0.026    | 0.007    | -0.015          | -0.060               | -0.024   | -0.008        | -0.067     | 0.056               | 0.043                    |
| Often fights or bullies     | -0.132**        | -0.009          | -0.099   | -0.05    | 0.138           | 0.044                | -0.059   | 0.033         | -0.019     | 0.027               | 0.017                    |
| Often unhappy               | 0.255***        | <b>0.400***</b> | 0.154**  | 0.177*** | 0.108*          | 0.054                | 0.140**  | 0.168**       | 0.210***   | -0.319***           | -0.321***                |
| Generally liked by others # | 0.045           | -0.054          | -0.000   | 0.063    | -0.023          | -0.059               | 0.057    | -0.007        | -0.032     | 0.022               | 0.019                    |

**Wolf, RT., Ratcliffe, J., Chen, G., Jeppesen, P. The longitudinal validity of proxy-reported CHU9D.**

|                                        |                 |          |         |        |           |           |          |           |          |               |           |
|----------------------------------------|-----------------|----------|---------|--------|-----------|-----------|----------|-----------|----------|---------------|-----------|
| Easily distracted                      | -0.062          | 0.076    | -0.017  | 0.017  | 0.142**   | 0.260***  | -0.063   | 0.142**   | 0.106*   | -0.126*       | -0.127*   |
| Low confidence                         | <b>0.125*</b>   | 0.068    | 0.055   | -0.015 | -0.024    | 0.025     | 0.039    | 0.033     | 0.144**  | -0.083        | -0.083    |
| Kind to younger children #             | 0.065           | 0.015    | 0.028   | 0.007  | -0.082    | -0.068    | 0.050    | -0.108*   | -0.047   | 0.049         | 0.045     |
| Often lies / cheats                    | -0.202***       | -0.021   | -0.062  | -0.033 | 0.049     | 0.023     | -0.132** | 0.131**   | 0.010    | 0.001         | 0.014     |
| Picked on or bullied                   | -0.030          | 0.111*   | 0.055   | -0.023 | 0.013     | 0.071     | -0.046   | 0.012     | -0.032   | <i>-0.029</i> | -0.044    |
| Volunteers to help #                   | 0.134**         | 0.022    | 0.031   | 0.082  | -0.156**  | -0.074    | 0.085    | -0.086    | -0.049   | 0.024         | 0.011     |
| Thinks before acting #                 | 0.138**         | -0.035   | 0.067   | 0.103  | -0.193*** | -0.113*   | 0.055    | -0.160**  | -0.065   | <i>0.072</i>  | 0.072     |
| Steals                                 | -0.126*         | -0.054   | -0.021  | -0.031 | 0.004     | 0.007     | -0.098   | -0.014    | -0.044   | <i>0.053</i>  | 0.063     |
| Better with adult than peers           | 0.121*          | 0.096    | 0.011   | 0.061  | -0.017    | 0.116*    | -0.044   | -0.066    | 0.117*   | <i>-0.083</i> | -0.087    |
| Many fears                             | <b>0.340***</b> | 0.199*** | 0.135** | 0.049  | -0.028    | 0.021     | 0.167*** | 0.019     | 0.133**  | -0.201***     | -0.218*** |
| Good attention span / follow through # | 0.057           | -0.118*  | 0.009   | -0.007 | -0.169*** | -0.446*** | 0.014    | -0.227*** | -0.164** | 0.202***      | 0.221***  |

Notes: # Higher value is better. \* P < 0.05 \*\*P < 0.01 \*\*\*P < 0.001. Bolded figures are those where CHU9D and SDQ have clear conceptual overlap according to Furber & Segal<sup>12</sup>. Italic figures in CHU9D adult weights column are the correlations where Furber & Segal<sup>12</sup> find correlations larger than 0.2 and where we find correlations of 0.1 or lower.

## Wolf, RT., Ratcliffe, J., Chen, G., Jeppesen, P. The longitudinal validity of proxy-reported CHU9D.

Table C: Spearman rank correlation coefficients for CHU9D items and SDQ Impact items

|                                                 | Worried  | Sad      | Pain   | Tired    | Annoyed  | Schoolwork /homework | Sleep  | Daily Routine | Activities | <b>CHU9D adult weights</b> | <b>CHU9D adolescent weights</b> |
|-------------------------------------------------|----------|----------|--------|----------|----------|----------------------|--------|---------------|------------|----------------------------|---------------------------------|
| <b>Impact score</b>                             | 0.183*** | 0.308*** | 0.074  | 0.113*   | 0.160**  | 0.248***             | 0.020  | 0.282***      | 0.346***   | -0.330***                  | -0.329***                       |
| The difficulties upsets or distresses the child | 0.237*** | 0.395*** | 0.149  | 0.182*** | 0.111*   | 0.024                | 0.087  | 0.176***      | 0.206***   | -0.300***                  | -0.293***                       |
| Home life                                       | 0.049    | 0.217*** | 0.027  | 0.105*   | 0.248*** | 0.023                | 0.061  | 0.269***      | 0.072      | -0.220***                  | -0.215***                       |
| Friendships                                     | 0.164**  | 0.201*** | 0.116  | 0.084    | 0.051    | 0.133**              | 0.050  | 0.113*        | 0.288***   | -0.228***                  | -0.219***                       |
| Classroom learning                              | 0.033    | 0.066    | -0.063 | -0.049   | 0.031    | 0.407***             | -0.098 | 0.082         | 0.176***   | -0.081                     | -0.110*                         |
| Leisure activities                              | 0.106*   | 0.172*** | 0.0867 | 0.142**  | 0.108*   | 0.176***             | 0.063  | 0.181***      | 0.324***   | -0.258***                  | -0.242***                       |

Notes: \* P <0.05 \*\*P<0.01 \*\*\*P<0.001

# Wolf, RT., Ratcliffe, J., Chen, G., Jeppesen, P. The longitudinal validity of proxy-reported CHU9D.

Table D: Spearman rank correlation coefficients for CHU9D items and KIDSCREEN-27 scales and items.

|                                               | Worried   | Sad             | Pain        | Tired     | Annoyed   | Schoolwork /homework | Sleep     | Daily Routine | Activities | CHU9D adult weights | CHU9D adolescent weights |
|-----------------------------------------------|-----------|-----------------|-------------|-----------|-----------|----------------------|-----------|---------------|------------|---------------------|--------------------------|
| <b>Physical Well-being</b>                    | -0.266*** | -0.329***       | -0.251***   | -0.283*** | -0.103*   | -0.172***            | -0.157**  | -0.257***     | -0.436***  | 0.438***            | 0.408***                 |
| General health status #                       | 0.305***  | 0.318***        | 0.303***    | 0.120***  | 0.073     | 0.118*               | 0.146**   | 0.191***      | 0.334***   | -0.373***           | -0.324***                |
| Feel fit and well                             | -0.347*** | -0.361***       | -0.287***   | -0.267*** | -0.120    | -0.172***            | -0.169*** | -0.263***     | -0.364***  | 0.450***            | 0.440***                 |
| Physically active                             | -0.138**  | -0.199***       | -0.156**    | -0.191*** | -0.034    | -0.119*              | -0.085    | -0.176***     | -0.352***  | 0.274***            | 0.245***                 |
| Run well                                      | -0.125*   | -0.212***       | -0.187***   | -0.180*** | -0.037    | -0.101*              | -0.129**  | -0.163***     | -0.325***  | 0.303***            | 0.265***                 |
| Feel energetic                                | -0.270*** | -0.300***       | -0.157**    | -0.323*** | -0.154**  | -0.229***            | -0.145**  | -0.258***     | -0.356***  | 0.410***            | 0.400***                 |
| <b>Psychological Well-being</b>               | -0.439*** | -0.541***       | -0.186***   | -0.309*** | -0.222*** | -0.265***            | -0.220*** | -0.334***     | -0.430***  | 0.565***            | 0.571***                 |
| Life been enjoyable                           | -0.333*** | -0.409***       | -0.175***   | -0.257*** | -0.223*** | -0.253***            | -0.174*** | -0.236***     | -0.368***  | 0.443***            | 0.445***                 |
| In good mood                                  | -0.341*** | -0.397***       | -0.196***   | -0.254*** | -0.251*** | -0.167***            | -0.187*** | -0.260***     | -0.331***  | 0.465***            | 0.453***                 |
| Have had fun                                  | -0.292*** | -0.384***       | -0.104*     | -0.184*** | -0.183**  | -0.203***            | -0.129*   | -0.252***     | -0.360***  | 0.410***            | 0.404***                 |
| Felt sad #                                    | 0.0435*** | <b>0.595***</b> | 0.177***    | 0.238***  | 0.245***  | 0.205***             | 0.203***  | 0.280***      | 0.285***   | -0.509***           | -0.541***                |
| Felt too sad and didn't want to do anything # | 0.346***  | 0.411***        | 0.162**     | 0.288***  | 0.163**   | 0.245***             | 0.246***  | 0.304***      | 0.398***   | -0.484***           | -0.481***                |
| Felt lonely #                                 | 0.313***  | 0.378***        | 0.087-0.066 | 0.193***  | 0.062     | 0.221***             | 0.155**   | 0.185***      | 0.302***   | -0.367***           | -0.380***                |
| Been happy with the way he/she is             | -0.288*** | -0.330***       | -0.057      | -0.201*** | -0.063    | -0.178***            | -0.090*   | -0.238***     | -0.253***  | 0.316***            | 0.328***                 |
| <b>Autonomy &amp; Parent Relation</b>         | -0.004    | -0.103*         | -0.052      | 0.049     | -0.177*** | -0.153**             | -0.079    | -0.227***     | -0.079     | 0.197***            | 0.200***                 |
| Child had enough time for him/herself         | -0.085    | -0.062          | 0.007       | -0.042    | -0.063    | -0.025               | -0.114*   | -0.119**      | 0.028      | 0.106*              | 0.134**                  |

**Wolf, RT., Ratcliffe, J., Chen, G., Jeppesen, P. The longitudinal validity of proxy-reported CHU9D.**

|                                                                               |          |           |        |        |           |         |        |           |           |          |          |
|-------------------------------------------------------------------------------|----------|-----------|--------|--------|-----------|---------|--------|-----------|-----------|----------|----------|
| Child been able to do the things that he/she wants to do in his/her free time | -0.093   | -0.084    | -0.055 | -0.032 | -0.057    | -0.127* | -0.064 | -0.153*** | -0.093    | 0.151**  | 0.163**  |
| Child felt that his/her parent(s) had enough time for him/her                 | -0.040   | -0.147**  | -0.047 | -0.015 | -0.152**  | -0.067  | -0.091 | -0.125*   | -0.047    | 0.178*** | 0.161**  |
| Child felt that his/her parent(s) treated him/her fairly                      | 0.056    | -0.137**  | -0.066 | 0.029  | -0.319*** | -0.035  | -0.083 | -0.239*** | -0.031    | 0.189*** | 0.184*** |
| Child been able to talk to his/her parent(s) when he/she wanted to            | 0.051    | -0.102*   | 0.005  | 0.036  | -0.159**  | -0.073  | -0.072 | -0.192*** | -0.076    | 0.176*** | 0.159**  |
| Child had enough money to do the same things as his/her friends               | 0.057    | 0.040     | -0.026 | 0.121* | 0.007     | -0.105* | 0.022  | -0.062    | -0.029    | 0.016    | 0.022    |
| Child felt that he/she had enough money for his/her expenses                  | 0.087    | 0.050     | -0.096 | 0.081  | -0.026    | -0.129* | 0.036  | -0.074    | -0.033    | 0.018    | 0.019    |
| <b>Social Support &amp; Peers</b>                                             | -0.150** | -0.173*** | -0.079 | -0.056 | -0.028    | -0.121* | -0.046 | -0.117*   | -0.316*** | 0.217*** | 0.187*** |

**Wolf, RT., Ratcliffe, J., Chen, G., Jeppesen, P. The longitudinal validity of proxy-reported CHU9D.**

|                                             |           |           |        |         |          |           |        |           |           |          |          |
|---------------------------------------------|-----------|-----------|--------|---------|----------|-----------|--------|-----------|-----------|----------|----------|
| Child spent time with his/her Friends       | -0.110*   | -0.150**  | -0.082 | -0.128* | -0.033   | -0.145**  | -0.028 | -0.120*   | -0.334*** | 0.218*** | 0.184*** |
| Child had fun with his/her friends          | -0.188**  | -0.164**  | -0.031 | -0.077  | -0.014   | -0.106*   | -0.055 | -0.108*   | -0.321*** | 0.218*** | 0.184*** |
| Child and his/her friends helped each other | -0.106*   | -0.119*   | -0.036 | 0.017   | -0.020   | -0.104*   | -0.017 | -0.063    | -0.250*** | 0.146**  | 0.125*   |
| Child been able to rely on his/her friends  | -0.120*   | -0.138**  | -0.054 | -0.010  | -0.013   | -0.076    | -0.087 | -0.094    | -0.210*** | 0.161**  | 0.144**  |
| <b>School Environment</b>                   | -0.114*   | -0.168*** | 0.039  | -0.012  | -0.118*  | -0.458*** | -0.080 | -0.199*** | -0.297*** | 0.266*** | 0.260*** |
| Child been happy at school                  | -0.301*** | -0.263*** | -0.054 | -0.126* | -0.081   | -0.347*** | -0.145 | -0.155**  | -0.373*** | 0.328*** | 0.323*** |
| Child got on well at school                 | -0.083    | -0.092    | 0.062  | 0.035   | -0.063   | -0.497*** | 0.006  | -0.187*** | -0.269*** | 0.201*** | 0.208*** |
| Child been able to pay attention            | -0.056    | -0.163**  | 0.027  | -0.102* | -0.147** | -0.388*** | -0.097 | -0.188*** | -0.252*** | 0.249*** | 0.244*** |
| Child got along well with his/her teachers  | 0.054     | -0.038    | 0.089  | 0.130** | -0.100*  | -0.224*** | -0.049 | -0.084    | -0.073    | 0.079    | 0.061    |

Notes: # Higher value is better. \* P <0.05 \*\*P<0.01 \*\*\*P<0.001
